# Supplementary figures and images for: Transcription alterations of KCNQ1 associated with imprinted methylation defects in the Beckwith–Wiedemann locus
Source: PubMed Central journal article supplement — Genet Med. 2019 Jan 12;21(8):1808–20. doi: 10.1038/s41436-018-0416-7 (PMC6687501; doi:10.1038/s41436-018-0416-7), 2019-01-12

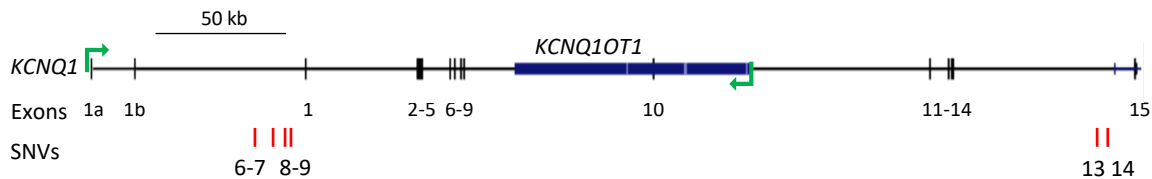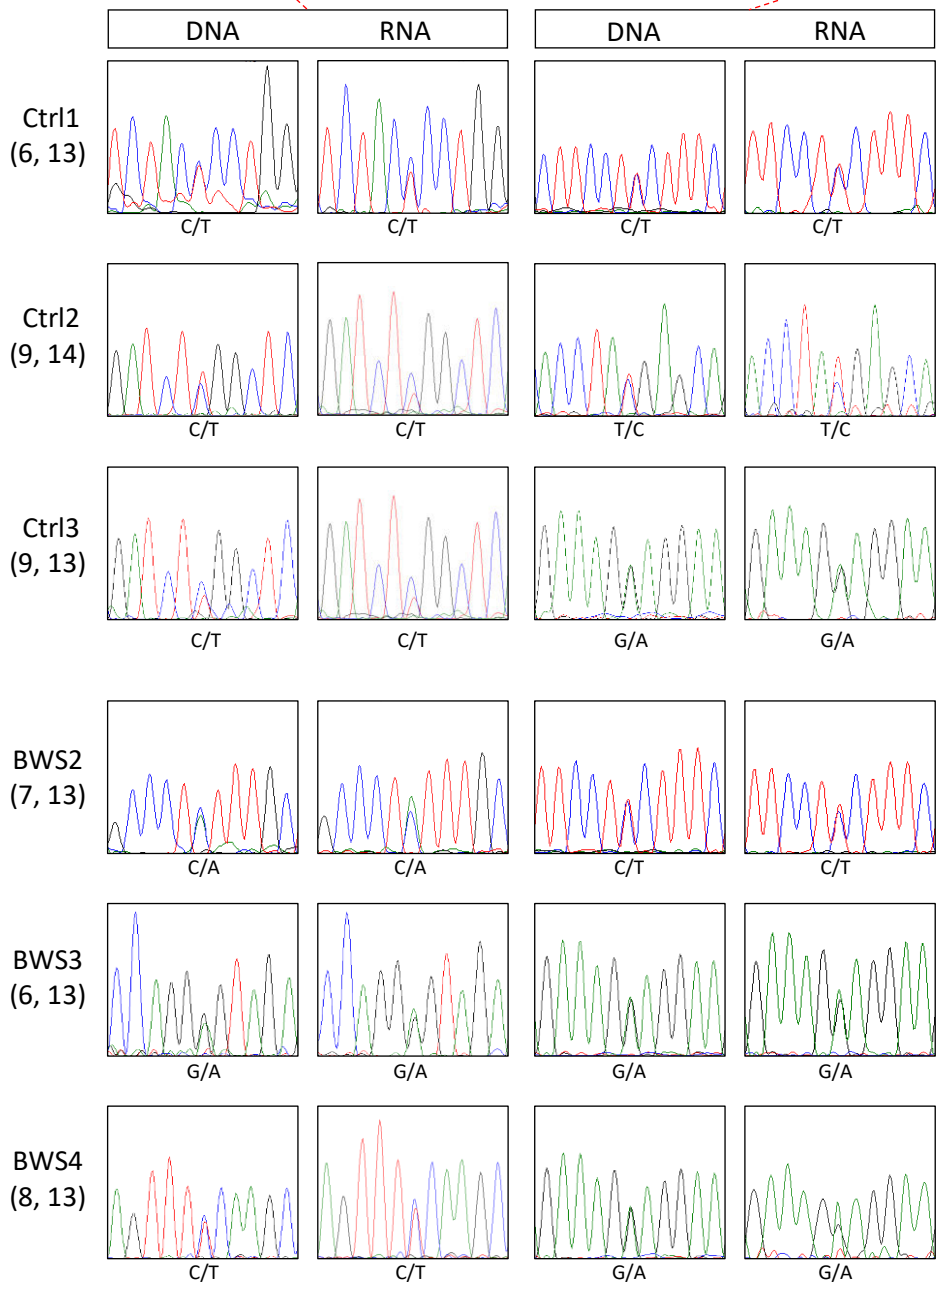

Supplement: EMS81803-supplement-Figure_S3.pdf [file EMS81803-supplement-Figure_S3.pdf]
